1 **Title**

2 Persistent activation of interlinked Th2-airway epithelial gene networks in sputum-derived  
3 cells from aeroallergen-sensitized symptomatic atopic asthmatics

4 **Authors**

5 Anya C. Jones\*, MSc†§, Niamh M. Troy\*, BSc†, Elisha White, MHLtSci†, Elysia M. Hollams,  
6 PhD†, Alexander M. Gout, PhD†, Kak-Ming Ling, BSc†, Anthony Kicic, PhD†‡§||, Peter D Sly,  
7 MD DSc\*\*, Patrick G Holt, Dsc FAA+\*\*, Graham L Hall, PhD†, Anthony Bosco, PhD†

8 **Affiliations**

9 † Telethon Kids Institute, The University of Western Australia;

10 ‡ Department of Respiratory Medicine, Princess Margaret Hospital for Children, Western  
11 Australia;

12 § School of Paediatrics and Child Health, The University of Western Australia, Western  
13 Australia;

14 || Centre for Cell Therapy and Regenerative Medicine, School of Medicine and Pharmacology,  
15 The University of Western Australia, Western Australia;

16 \*\* Child Health Research Centre, The University of Queensland, Brisbane, Australia.

17 **Corresponding author**

18 Dr. Anthony Bosco

19 Tel no.: +618 9489 7895

20 Fax no.: +618 9489 7700

21 Email: [Anthony.Bosco@telethonkids.org.au](mailto:Anthony.Bosco@telethonkids.org.au)

22 **Author contributions**

23 \* These authors contributed equally to this work. Conception and design of research: AB,  
24 GLH, PGH; Acquisition of data: ACJ, NMT, EW, KML, AK; Data analysis: ACJ, NMT, EW, EMH,  
25 AMG, KML, AK, AB; Drafting the manuscript for important intellectual content: ACJ, NMT,  
26 PGH, AB; Approval of final version of manuscript: ACJ, NMT, EW, EMH, AMG, KML, AK, PGH,  
27 GLH, AB.

28 **Funding**

29 This study was funded by the Asthma Foundation WA, the Department of Health WA, and  
30 the NHMRC. AB is funded by a BrightSpark Foundation McCusker Fellowship. GLH is a  
31 NHMRC Fellow. AG is supported by the McCusker Charitable Foundation Bioinformatics  
32 Centre. ACJ is a recipient of an Australian Postgraduate Award and a Top-Up Award from the  
33 University of Western Australia.

34 **Keywords**

35 Asthma, House dust mite, Transcriptomics, Sputum, Raine Study

36

37

38 **ABSTRACT**

39

40 **Rationale:** Atopic asthma is a persistent disease characterized by intermittent wheeze and  
41 progressive loss of lung function. The disease is thought to be driven primarily by chronic  
42 aeroallergen-induced Th2-associated airways inflammation. However, the vast majority of  
43 atopics do not develop asthma-related wheeze, despite ongoing exposure to aeroallergens  
44 to which they are strongly sensitized, indicating that additional pathogenic mechanism(s)  
45 operate in conjunction with Th2 immunity to drive asthma pathogenesis.

46 **Objectives:** Employ systems level analyses to identify inflammation-associated gene  
47 networks operative at baseline in sputum-derived RNA from house dust mite-sensitized  
48 (HDM<sup>S</sup>) subjects with/without wheezing history; identify networks characteristic of the  
49 ongoing asthmatic state. All subjects resided in the “constitutively-HDM<sup>high</sup>” Perth  
50 environment.

51 **Methods:** Genome wide expression profiling by RNASeq followed by gene coexpression  
52 network analysis.

53 **Measurements/Results:** HDM<sup>S</sup>-nonwheezers displayed baseline gene expression in sputum  
54 including IL-5, IL-13 and CCL17. HDM<sup>S</sup>-wheezers showed equivalent expression of these  
55 classical Th2-effector genes but their overall baseline sputum signatures were more  
56 complex, comprising hundreds of Th2-associated and epithelial-associated genes,  
57 networked into two separate coexpression modules. The first module was connected by the  
58 hubs EGFR, ERBB2, CDH1 and IL-13. The second module was associated with CDHR3, and  
59 contained genes that control mucociliary clearance.

60 **Conclusions:** Our findings provide new insight into the inflammatory mechanisms operative  
61 at baseline in the airway mucosal microenvironment in atopic asthmatics undergoing natural  
62 perennial aeroallergen exposure. The molecular mechanism(s) that determine susceptibility  
63 to asthma amongst these subjects involve interactions between Th2- and epithelial function-  
64 associated genes within a complex co-expression network, which is not operative in  
65 equivalently sensitized/exposed atopic non-asthmatics.

66

67 **INTRODUCTION**

68 Asthma is a chronic disease of the conducting airways that is characterized by airways  
69 inflammation, airways remodeling, and progressive loss of lung function. It is increasingly  
70 recognized as a highly heterogeneous disorder comprising multiple sub-phenotypes (1). The  
71 atopic form of the disease develops in early childhood, and is initiated by sensitization to  
72 inhalant allergens exemplified by house dust mite (HDM). Progression of atopic asthma  
73 towards chronicity is driven by repeated cycles of airways inflammation, in particular severe  
74 exacerbations triggered by respiratory infections which involve interactions between host  
75 anti-viral and atopy-associated effector mechanisms (2, 3), and the rate of the ensuing  
76 decline in lung function is related to the frequency and intensity of these exacerbations (4-  
77 6).

78

79 Recent clinical intervention studies, including those demonstrating that treatment with anti-  
80 IgE reduces exacerbation frequency, confirms the causal role of Th2 responses in these  
81 intermittent events (7-9). However the degree to which chronic exposure to Th2-stimulatory  
82 perennial aeroallergens contributes to the inflammatory milieu in the airway mucosa of  
83 sensitized atopics during the periods between overt exacerbation events, thus potentially  
84 influencing long-term persistence of the asthma-associated wheezy phenotype, remains  
85 unclear. This is an important issue in relation to design of future therapeutic strategies for  
86 prevention of asthma progression i.e. is it sufficient to target severe exacerbation events  
87 alone, or is it potentially necessary to also dampen ongoing aeroallergen-driven Th2  
88 reactivity at baseline in sensitized/perennially exposed subjects?

89

90 We have addressed this issue in a study population consisting of 22yr olds from an  
91 unselected birth cohort resident in Perth Western Australia (10). We have previously shown  
92 that the dominant asthma-associated aeroallergen in this region is HDM (11) which is  
93 present in local households at high levels throughout the year (12), and accordingly the  
94 study focused primarily on atopics who were sensitized and chronically exposed to HDM.  
95 Our approach was based on the recent demonstration that induced sputum, which contains  
96 a sample of cell populations present on the airway surface, can potentially be used for gene  
97 expression profiling of wheeze-associated inflammatory responses in asthmatics (13, 14).

98

99 In the present investigation we have employed RNA-Seq in conjunction with coexpression  
100 network analysis to profile asthma-associated gene networks in sputum samples collected at  
101 (symptom-free) baseline from study groups matched for age, HDM sensitization status and  
102 environmental exposure, but dichotomous with respect to wheezing symptom expression.  
103 Our findings suggest that upregulation of Th2 signature genes exemplified by the effector  
104 cytokines IL-5 and IL-13 is a common feature across the whole HDM<sup>S</sup>/exposed population at  
105 baseline, but in the subgroup with history of current wheeze the Th2 signature is more  
106 complex and intense, and is uniquely networked with a series of concomitantly upregulated  
107 epithelial cell associated pathways.

108

109

## 110 **METHODS**

### 111 **Study population**

112 This study was conducted within the 22-year follow-up of an unselected longitudinal birth  
113 cohort recruited in Perth, Western Australia, namely the Western Australia Pregnancy

114 Cohort (Raine study, (10, 11)). The 22-year follow-up included 1234 active participants.  
115 Subjects were selected for case/control studies based on their clinical characteristics and the  
116 availability of high quality sputum samples (see below). Four clinical groups were defined; (i)  
117 HDM sensitized atopics (SPT  $\geq$  3.0mm) with current wheeze during previous 12mths, with or  
118 without a physician diagnosis of “asthma ever” (HDM<sup>S</sup> wheezers, n=16); (ii) HDM sensitized  
119 atopics without current asthma or wheeze (HDM<sup>S</sup> nonwheezers, n=24); (iii) nonatopics with  
120 current asthma and/or wheeze (nonatopic wheezers, n=7); (iv) nonatopics without current  
121 asthma or wheeze (nonatopic controls, n=21).

122

### 123 **Sputum induction and processing**

124 Induced sputum was obtained after mannitol inhalation challenge (15). The samples were  
125 stored at 4 °C for up to 2 hours prior to processing. Sputum was processed (see the online  
126 data supplement) by selection and subsequent disruption of mucus plugs with forceps to  
127 minimize contamination with saliva (16).

128

### 129 **Transcriptome profiling by RNA-Seq**

130 Total RNA was extracted from good quality sputum (cell viability > 48%, squamous < 32%)  
131 employing TRIzol (Ambion) followed by RNeasy MinElute (QIAGEN). The mean $\pm$ sd RNA  
132 integrity number was 7.6  $\pm$ 1.0 as assessed on the bioanalyzer (Agilent). RNA samples were  
133 shipped on dry ice to the Australian Genome Research Facility for library preparation  
134 (TruSeq Stranded mRNA Library Prep Kit, Illumina) and sequencing (Illumina HiSeq2500, 50-  
135 bp single-end reads, v4 chemistry). The raw data are available at the NCBI Short Read  
136 Archive (accession; SRP057350).

137

## 138 **RNA-Seq data analysis**

139 The quality of the RNA-Seq data was assessed with the Bioconductor package Rqc (see Fig.  
140 E1 in the online data supplement). Reads were aligned to the reference genome (hg19)  
141 using Subread, and summarized at the gene-level using featureCounts (17). Genes with less  
142 than 300 total counts were removed from the analysis. Differentially expressed genes were  
143 identified employing Empirical analysis of digital gene expression data in R (EdgeR) with  
144 False Discovery Rate (FDR) control for multiple testing (18). The analysis was adjusted for  
145 latent variation using the Remove Unwanted Variation (RUV) algorithm (Fig. E2 (19)). A  
146 coexpression network was constructed employing the weighted gene coexpression network  
147 analysis (WGCNA) algorithm (20). Prior to network analysis, the count data was transformed  
148 using the variance stabilizing transformation algorithm (18). Modules associated with clinical  
149 traits were identified by plotting the  $-\log_{10}$  p-values from the edgeR analysis on a module-  
150 by-module basis. The wiring diagram of selected gene networks was reconstructed  
151 employing two different methods. The first method utilized “prior knowledge” comprising  
152 experimentally supported molecular relationships based on data from the Ingenuity Systems  
153 KnowledgeBase ([www.ingenuity.com](http://www.ingenuity.com)) (20). The second method utilized unbiased  
154 connectivity patterns derived from WGCNA, and the network was visualized using VisANT  
155 (21). Biological pathways and functions enriched in the data were identified with Enrichr  
156 (22).

157

## 158 **Immunostaining**

159 Primary bronchial epithelial cells were obtained from 8 healthy nonatopic children and 8  
160 atopic asthmatic children with HDM allergy who were undergoing elective surgery for non-

161 respiratory related conditions. Cytospins were prepared and stained for CDHR3 and DAPI  
 162 using methods previously described (see online supplementary methods).

163

164

## 165 RESULTS

166 The characteristics of the 4 study groups are illustrated in Table 1.

167

168 **Table 1. Characteristics of the study population**

169

|                                                      | Nonatopic controls | Nonatopic wheezers | HDM <sup>S</sup> nonwheezers | HDM <sup>S</sup> wheezers | P                   |
|------------------------------------------------------|--------------------|--------------------|------------------------------|---------------------------|---------------------|
| Number of participants                               | 21                 | 7                  | 24                           | 16                        |                     |
| Male (%)                                             | 42.9               | 42.9               | 54.2                         | 56.3                      | 0.804               |
| Wheeze in past 12 months [A] (%)                     | 0.0                | 100.0              | 0.0                          | 100.0                     |                     |
| Doctor diagnosis of asthma ever [B] (%)              | 0.0* a             | 57.1 a,b           | 43.5* a                      | 93.8 b                    | <0.001              |
| Asthma medication use in past 12 months [C] (%)      | 4.8 a              | 14.3 a             | 8.3 a                        | 75.0 b                    | <0.001              |
| Current medicated asthma [Positive for A,B&C] (%)    | 0.0                | 14.3               | 0.0                          | 75.0                      | 0.007 <sup>^</sup>  |
| Current asthma [Positive for A&B] (%)                | 0.0                | 57.1               | 0.0                          | 93.8                      | 0.033 <sup>^</sup>  |
| Airways hyperresponsiveness (%)                      | 0.0                | 0.0                | 0.0                          | 43.7                      | <0.001              |
| Any positive skin prick test (wheal $\geq$ 3mm; %)   | 0.0                | 0.0                | 100.0                        | 100.0                     |                     |
| Positive HDM skin prick test (wheal $\geq$ 3mm; %)   | 0.0                | 0.0                | 100.0                        | 100.0                     |                     |
| <b>HDM SPT wheal diameter (mm):</b>                  |                    |                    |                              |                           |                     |
| <i>Dermatophagoides pteronyssinus</i>                | 0.0 [0]            | 0.0 [0]            | 6.0 [5.3]                    | 9.0 [3.5]                 | 0.039 <sup>^^</sup> |
| <i>Dermatophagoides farinae</i>                      | 0.0 [0]            | 0.0 [0]            | 4.3 [5.5]                    | 6.7 [5.7]                 | 0.090 <sup>^^</sup> |
| Sum of <i>D. pteronyssinus</i> and <i>D. farinae</i> | 0.0 [0]            | 0.0 [0]            | 10.3 [11.3]                  | 15.9 [10.1]               | 0.062 <sup>^^</sup> |
| Parental history of asthma at recruitment (%)        | 10.0*              | 28.6               | 21.7*                        | 37.5                      | 0.263               |
| Baseline FEV (z score)                               | 0.0 [1.3]          | 0.4 [0.6]          | -0.3 [1.5]                   | -0.6 [1.5]                | 0.438               |
| Baseline FVC <sub>1</sub> (z score)                  | -0.3 [1.0]         | 0.3 [1.3]          | 0.0 [1.2]                    | 0.1 [1.4]                 | 0.609               |
| Baseline FEV/FVC <sub>1</sub> (z score)              | -0.2 [1.1]         | 0.1 [1.5]          | -0.3 [1.3]                   | -1.0 [1.2]                | 0.137               |



|                                                                                                                                                                                                                                                                                                                                                                                                                                                                                                                                                                                                                                                                                                                                                                                                    |             |              |              |              |        |
|----------------------------------------------------------------------------------------------------------------------------------------------------------------------------------------------------------------------------------------------------------------------------------------------------------------------------------------------------------------------------------------------------------------------------------------------------------------------------------------------------------------------------------------------------------------------------------------------------------------------------------------------------------------------------------------------------------------------------------------------------------------------------------------------------|-------------|--------------|--------------|--------------|--------|
| Current rhinoconjunctivitis (%)                                                                                                                                                                                                                                                                                                                                                                                                                                                                                                                                                                                                                                                                                                                                                                    | 0.0 a       | 42.9 b       | 0.0 a        | 75.0 b       | <0.001 |
| Current smokers (%)                                                                                                                                                                                                                                                                                                                                                                                                                                                                                                                                                                                                                                                                                                                                                                                | 23.8        | 14.3         | 33.3         | 25.0         | 0.740  |
| Height (cm)                                                                                                                                                                                                                                                                                                                                                                                                                                                                                                                                                                                                                                                                                                                                                                                        | 176 [14.0]  | 170.0 [19.0] | 175.5 [16.0] | 173.0 [24.0] | 0.422  |
| Weight (kg)                                                                                                                                                                                                                                                                                                                                                                                                                                                                                                                                                                                                                                                                                                                                                                                        | 67.6 [21.4] | 76.9 [27.0]  | 75.0 [23.3]  | 70.3 [41.5]  | 0.561  |
| Hip to waist ratio                                                                                                                                                                                                                                                                                                                                                                                                                                                                                                                                                                                                                                                                                                                                                                                 | 0.84 [0.1]  | 0.83 [0.1]   | 0.85 [0.1]   | 0.87 [0.1]   | 0.754  |
| Age at assessment and sputum collection (years)                                                                                                                                                                                                                                                                                                                                                                                                                                                                                                                                                                                                                                                                                                                                                    | 22.0 [0.4]  | 22.0 [0.3]   | 22.1 [1.0]   | 22.0 [0.9]   | 0.754  |
| Median [interquartile range] is displayed for all continuous measures. P value is derived from analyses comparing the four groups: prevalence values were compared by Chi square analysis; continuous measures were compared by Kruskal Wallis analysis. Where significant differences were observed between the four group groups (P<0.5 in table), each letter denotes sputum groups that do not differ significantly at the 0.05 level after adjusting for multiple comparisons (a vs a = not different; a vs b = significantly different). *Data was missing for 1 participant in each group; percentage represents proportion of available cases positive for outcome. ^Wheezing groups only were compared by Mann Whitney U test. ^^Atopic groups only were compared by Mann Whitney U test. |             |              |              |              |        |

170

171 The cellular composition of sputum from these subjects was dominated by macrophages  
 172 and neutrophils, which constituted 88-94% of the overall population, and the proportion of  
 173 these cell types (and overall total yields) did not differ between the groups (see  
 174 supplementary Table E1). Squamous cells and lymphocytes comprised on average 4.5% and  
 175 1.8% respectively and also did not differ between groups. Small numbers of eosinophils  
 176 were detectable only in the atopic groups and were highest in the wheezers (Table E1).

177

178 Gene expression patterns in sputum were firstly compared between HDM<sup>S</sup> nonwheezers  
 179 and nonatopic controls. The data showed that 80 genes were upregulated (including the Th2  
 180 signature genes IL-5 [4.15 logfold] and IL-13 [2.92 logfold]) and 11 genes were  
 181 downregulated (FDR < 0.05, Table E2). To obtain detailed information on the regulatory  
 182 interactions between these genes, we utilized experimentally supported findings from  
 183 published studies (prior knowledge) to reconstruct the underlying network (20). This  
 184 analysis showed that the genes were mainly involved in IL-1B and IL-5/IL-13 signaling (Fig 1).

185

186 Secondly, comparing gene expression patterns between HDM<sup>S</sup> wheezers and nonatopic  
187 controls showed that 842 genes were upregulated (again including IL-5 [5.29 logfold], IL-13  
188 [3.03 logfold] and IL-33 [2.59 logfold]) and 11 genes were downregulated in the wheezers  
189 (FDR < 0.05, Table E3). As illustrated in Fig. 2, the prior knowledge network revealed that  
190 these genes revolved around a few hubs - erb-b2 receptor tyrosine kinase 2 (ERBB2/HER2),  
191 which was involved in 59 interactions (also known as 'edges' in graph theory (23)), IL-13 (44  
192 edges), and E-Cadherin/CDH1 (37 edges).

193

194 Thirdly, we compared gene expression patterns between HDM<sup>S</sup> wheezers versus HDM<sup>S</sup>  
195 nonwheezers. The data showed that 859 genes were upregulated and 8 genes were  
196 downregulated (FDR < 0.05, Table E4). The prior knowledge network constructed from these  
197 genes (Fig. 3) identified epidermal growth factor receptor (EGFR, 60 edges), ERBB2 (56  
198 edges) and CDH1 (38 edges) as hub genes. It is noteworthy that IL-13 did not feature here  
199 since it was not differentially expressed after adjustment for multiple testing (p-value =  
200 0.028, FDR = 0.27). In contrast, IL-33 was upregulated in this comparison (2.74 logfold; Table  
201 E4).

202

203 Finally, we compared gene expression in nonatopic wheezers with nonatopic controls, and a  
204 single gene - LIM domain binding 3 (LDB3), was upregulated in the subjects with wheeze  
205 (FDR =  $2.6 \times 10^{-5}$ ). As expected, there was no evidence of a Th2 signature.

206

207 It has been reported that hub genes in biological interaction networks often exhibit limited  
208 expression changes in experimental asthma models (24), thus a potential caveat of the  
209 above analyses, which focused on differentially expressed genes, is that some hubs may

210 have escaped detection. To address this issue, we constructed a genome-wide coexpression  
211 network, utilizing the data from both atopic groups (n=40). The resulting network comprised  
212 14,833 genes organized into 23 coexpression modules. To identify disease-associated  
213 modules, we plotted the  $-\text{Log}_{10}$  p-values derived from the above differential expression  
214 analyses on a module-by-module basis. The data showed that the modules were not  
215 different between HDM<sup>S</sup> nonwheezers and nonatopic controls (Fig E5A). In contrast, three  
216 modules (designated A, P, and Q) were upregulated in HDM<sup>S</sup> wheezers versus the other two  
217 groups (nonatopic controls, HDM<sup>S</sup> nonwheezers, Fig E5B, E5C).

218

219 Module “P” contained 319 genes, and the prior knowledge network constructed from these  
220 genes contained the hub genes EGFR (35 edges) and CDH1 (31 edges, Fig E6). Module “Q”  
221 contained 440 genes, and the hubs in the resultant prior knowledge network were ERBB2  
222 (35 edges) and IL-13 (27 edges, Fig E7). Principal component analysis showed that these two  
223 modules (P, Q) were highly correlated (Pearson correlation: 0.897, P-value =  $4.441 \times 10^{-15}$ )  
224 (Fig E8), suggesting they are subunits of a larger parent module. Therefore, we merged them  
225 into a single network. In the merged network the dominant hubs were EGFR (73 edges),  
226 ERBB2 (65 edges), CDH1 (56 edges) and IL-13 (48 edges, Fig E9). Notably, these hubs connect  
227 to both common and unique pathways (Fig 4). The biological function of the genes that  
228 interact with the hubs was interrogated using Gene Ontology terms (Table E5) and Pubmed  
229 searches (Table E6). Module “A” contained 506 genes. It was not possible to reconstruct  
230 this module using prior knowledge, because no interactions were found for the vast majority  
231 of genes. Therefore we used unbiased correlation patterns to reconstruct the network (21).  
232 This analysis showed that the highest-ranking coexpression hubs were TEK1, FOXJ1,  
233 ARMC3, PIFO, DNAH5, RSPH1, FAM81B, SNTN, CDHR3, ERICH3, DNAH9, and CAPSL (Fig 5).

234 This module was strongly enriched with genes involved in the function of ciliated epithelial  
235 cells (Table E7).

236

237 We selected CDHR3 for further study because our data suggests it is a hub that functions in  
238 ciliated epithelial cells, and a previous study reported it was a susceptibility gene for severe  
239 asthma exacerbations (25). CDHR3 expression was examined in bronchial epithelial cells  
240 from HDM sensitized children with asthma (n=8) and from nonatopic controls (n=8) using  
241 immunostaining (see Table E7 for subject characteristics). The data showed there was  
242 positive staining localized to the apical surface of columnar epithelial cells in both cohorts  
243 (Fig. 6A, Fig E10). Of particular interest was the observation that expression of CDHR3  
244 (green) appeared more intense and defined in airway epithelial cells derived from the  
245 asthmatic children, and this was confirmed by image quantification (Fig. 6B).

246

247

## 248 **DISCUSSION**

249 An increasing body of epidemiological and experimental evidence (reviewed (2, 3, 26)), now  
250 supported by a range of intervention studies (4-6), argues for a causal role for Th2-  
251 associated inflammatory mechanisms in the aetiology and pathogenesis of atopic asthma.  
252 However the precise details of the underlying causal pathways still remain incompletely  
253 understood. In particular, the relative contributions of airways inflammation resulting from  
254 acute severe exacerbation events versus chronic exposure to relevant aeroallergens to time-  
255 related lung function decline in asthmatics, remains unknown. Moreover, while it is  
256 undisputed that sensitization to perennial aeroallergens is an important asthma risk factor,  
257 community wide studies clearly demonstrate that only a minority of sensitized subjects

258 (including of those highly sensitized to HDM (11)) ever develop persistent wheeze. This  
259 suggests that additional cofactor(s) may be required to unmask the full pathogenic potential  
260 of aeroallergen-specific sensitization. A likely candidate in this regard is the airway  
261 epithelium which may function as both a target for Th2-associated inflammation and/or as  
262 an active participant via production of a range of immunomodulatory molecules that can  
263 regulate the local functioning of Th2 cells and also Th2 cytokine-secreting group 2 innate  
264 lymphoid cells (7-9).

265

266 Our current study design represents an unbiased approach towards testing this possibility.  
267 In the core experiments we have sampled induced sputum cell populations from  
268 equivalently sensitized adult atopics undergoing natural aeroallergen exposure, and  
269 subsequent gene expression profiling and ensuing bioinformatics analyses after stratification  
270 on the basis of wheezing phenotypes provides novel insight into the nature of the  
271 inflammatory processes ongoing on the airway mucosal surface at the time of sampling.

272

273 Our initial analyses showed that a Th2 gene expression program was upregulated in baseline  
274 sputum samples from the HDM sensitized atopics, regardless of whether these subjects  
275 have current history of wheeze. The key Th2 genes IL-5 and IL-13 were upregulated to  
276 comparable degrees in both groups, however in HDM<sup>S</sup> nonwheezers the overall Th2  
277 program was restricted to only a small number of IL-5/IL-13-associated genes. In contrast,  
278 hundreds of genes were upregulated in HDM<sup>S</sup> wheezers and network analysis suggested  
279 that these genes function in the context of two discrete coexpression modules.  
280 Reconstruction of the first module using prior knowledge revealed that the hub genes EGFR,  
281 ERBB2, CDH1, and IL-13 dominated the network structure. The second coexpression module

282 comprised genes that control mucociliary clearance, and reconstruction of this module  
283 employing unbiased gene coexpression patterns identified CDHR3 as a hub. Overall, our  
284 findings suggest that the molecular mechanisms that determine susceptibility to asthma-  
285 associated wheeze amongst HDM sensitized atopics involve complex interactions between  
286 Th2 and epithelial gene networks.

287

288 EGFR was the dominant hub in the first module. Downstream of this gene is a complex  
289 signaling pathway that can be activated by multiple ligands (e.g. amphiregulin, EGF,  
290 epiregulin, HB-EGF, TGF- $\alpha$ ) (27). Puddicombe et al. reported that EGFR was upregulated in  
291 the bronchial epithelium of patients with asthma and in particular severe asthma in  
292 comparison to healthy controls, and expression levels were correlated with sub-epithelial  
293 reticular membrane thickening (28). Le Cras et al. reported that inhibition of EGFR signaling  
294 with a tyrosine kinase inhibitor reduced goblet cell hyperplasia, airway hyperreactivity and  
295 airway smooth muscle thickening in a chronic mouse model of HDM exposure (29). The  
296 latter two phenotypes were also reduced by conditional transgenic expression of a  
297 dominant negative EGFR mutant in the lung epithelium. Together, these data suggest that  
298 upregulation of EGFR signaling networks in the context of HDM exposure plays a causal role  
299 in the development of asthma-related traits.

300

301 The second hub ERBB2 is an orphan receptor from the EGFR family. It lacks a ligand-binding  
302 domain and transduces signals by forming heterodimers with other ligand bound members  
303 of the EGF receptor family, including EGFR. Polosa et al. reported that ERBB2 expression was  
304 not different in bronchial epithelial cells from asthmatic subjects compared to healthy  
305 controls (30). Song and Lee identified ERBB2 as an asthma susceptibility gene based on a

306 pathways analysis of genome-wide single nucleotide polymorphism data (31). The function  
307 of ERBB2 in asthma has not been previously investigated in animal models. Vermeer et al.  
308 reported that blockade of ERBB2 signaling in differentiated airway epithelial cells cultured at  
309 air-liquid interface reduced the number of ciliated epithelial cells (32). Kettle et al. reported  
310 that blocking ERBB2 signaling *in vitro* attenuated neuregulin-induced upregulation of  
311 MUC5AC and MUC5B (33). Notably, our network analysis showed that ERBB2 connects to  
312 anterior gradient 2 (AGR2). Previous studies have shown that ERBB2 upregulates the  
313 transcription and secretion of AGR2 (34, 35). AGR2 binds to immature MUC5AC in the  
314 endoplasmic reticulum, where it is thought to play a role in mucin folding. AGR2 deficient  
315 mice have profound defects in intestinal mucus production and reduced mucus production  
316 in the airways of allergen challenged mice (36, 37). Upregulation of ERBB2 networks may  
317 therefore influence asthma by modulating epithelial differentiation and mucus production.

318

319 The third hub E-cadherin (CDH1) is a cell adhesion molecule that forms adherence junctions  
320 between adjacent airway epithelial cells and maintains epithelial barrier integrity (38). HDM  
321 disrupts epithelial barrier function by delocalizing E-cadherin and other junction molecules,  
322 and this is thought to enhance allergic sensitization and inflammation (39). Polymorphisms  
323 in CDH1 are associated with airways remodeling and lung function decline, but only in those  
324 asthma patients using corticosteroids (40). Dysregulation of CDH1 signaling networks may  
325 impact on barrier function, inflammation, and airways remodeling.

326

327 The fourth hub IL-13 plays a central role in the pathogenesis of asthma by driving mucus  
328 production, airways hyper-responsiveness, and airways remodeling (26). It is produced by  
329 Th2 and group 2 innate lymphoid cells (ILC2), and it can also be produced by macrophages

330 (41, 42). IL-13 itself was not differentially expressed in HDM<sup>S</sup> wheezers versus nonwheezers,  
331 however network analysis demonstrated that in the wheezers it was connected to an  
332 extensive set of genes that have established roles in mouse models of allergic asthma. For  
333 instance, IL-33 stimulates the production of IL-5 and IL-13 by type 2 innate lymphoid cells  
334 and Th2 cells (43, 44), and in the presence of GM-CSF it can drive allergic inflammation at  
335 sub-threshold allergen doses (45). In animal models, deficiency of multiple genes from the  
336 IL-13 network can impact on asthma-related traits, including allergic sensitization and/or  
337 inflammation (ALOX15 (46), CYBB (47)), and airways hyperresponsiveness and mucus  
338 production/goblet cell hyperplasia (POSTN (48), SERPINB3/4 (49)). Moreover, transgenic  
339 expression of SPDEF or FOXA3 leads to upregulation of pulmonary Th2 cytokines and  
340 increased goblet cell differentiation, eosinophilic inflammation, and airway  
341 hyperresponsiveness (50). It is noteworthy, that whilst both IL-13 and EGFR ligands can  
342 induce the transcription of mucin genes, microarray profiling studies have shown that these  
343 pathways have largely independent effects on gene regulation in bronchial epithelial cells,  
344 and they play distinct roles in goblet cell metaplasia (36, 51, 52). Many other pathways were  
345 also identified that are regulated by IL-13 and relevant to asthma pathogenesis (e.g. CCL17,  
346 CCL26, CTGF, FCER1A, KITLG, MUC2, NOS2, TLR3, see Table E5).

347

348 The second coexpression module we identified comprised genes expressed in ciliated  
349 epithelial cells that control mucociliary clearance. The primary function of cilia is to beat in a  
350 synchronous manner to clear mucus from the airways and into the pharynx. Thomas et al.  
351 reported that cilia beat frequency was decreased in patients with asthma, and severe  
352 asthmatics had abnormal ciliary orientation and microtubule defects (53). Notably,  
353 employing network analysis we showed that CDHR3 was a highly ranked coexpression hub



354 within this module. This prompted us to examine CDHR3 protein expression in bronchial  
355 epithelial cells, and we demonstrated that expression was localized to the apical surface of  
356 columnar epithelial cells and was increased in HDM sensitized atopics with asthma  
357 compared to nonatopic controls. Ross et al. reported that CDHR3 was highly upregulated  
358 during mucociliary differentiation of human airway epithelial cells (54). Bisgaard and  
359 coworkers reported that polymorphisms in CDHR3 were associated with recurrent, severe  
360 childhood asthma exacerbations (25). More research will be required to investigate the role  
361 of CDHR3 in ciliated epithelial cells.

362

363 This exploratory study has limitations including small sample size that should be  
364 acknowledged. The molecular profiling studies were based on a heterogeneous cell  
365 population, and the pathways we identified were mainly associated with airway epithelial  
366 cells, which represent a minority population in sputum. We cannot exclude the possibility  
367 that epithelial shedding may have varied across the study groups and impacted on the  
368 analysis, although the RUV adjustment we employed should minimize any potential  
369 confounding by biological and/or technical variations. It is additionally noteworthy that  
370 using prior knowledge to reconstruct gene networks relies on data derived from  
371 experimental settings that may be far removed from the current study, which means that  
372 conclusions drawn from these analyses may be oversimplified given that genes can function  
373 in a context specific manner. Detailed follow-up mechanistic will therefore be required to  
374 elucidate the specific cellular mechanisms involved, and dissect the role of the molecular  
375 pathways we have identified.

376

377 Notwithstanding these caveats, our findings collectively are consistent with the general  
378 hypothesis that progression from subclinical responsiveness to aeroallergen exposure in  
379 atopic asthmatics to expression of the persistent wheezing phenotype involves the  
380 establishment of coexpression networks linking Th2 effector cytokine genes in immune cells  
381 recruited to the airway surface with genes expressed in adjacent epithelial cells that have  
382 been implicated in myriad asthma-relevant functions including mucosal barrier integrity,  
383 mucus production, tissue remodeling, responsiveness to irritants, and (exemplified by IL-33)  
384 intensification of aeroallergen-specific Th2 immunity. Targeting drug development programs  
385 specifically at these chronic mechanisms, as opposed to simply those that are triggered  
386 during acute exacerbation events, may provide improved therapeutics for prevention of  
387 asthma progression in atopics who represent the segment of the population at greatest risk  
388 of this disease.  
389

390 **Acknowledgements**

391

392 We would like to acknowledge the participants of the Raine Study for their ongoing  
393 participation in the study, the Raine Study Team for co-ordination of the study and data  
394 collection, and the UWA Centre for Science and the Sleep Study Technicians. We would like  
395 to acknowledge the University of Western Australia (UWA), Curtin University, the Raine  
396 Medical Research Foundation, the UWA Faculty of Medicine, Dentistry and Health Sciences,  
397 the Telethon Kids Institute, the Women's and Infant's Research Foundation (King Edward  
398 Memorial Hospital) and Edith Cowan University for providing funding for the Core  
399 Management of the Raine Study. The 22-year Raine Study follow-up was funded by NHMRC  
400 project grants 1027449, 1044840 and 1021858. Funding was also generously provided by  
401 Safework Australia. We would like to acknowledge the funding support of Pharmaxis,  
402 Australia, for the provision of the Aridol challenge kits used in this study. Pharmaxis did not  
403 have any input into the study design, data collection, interpretation and preparation of this  
404 manuscript.

405 **References**

406

407 1. Wenzel SE. Asthma phenotypes: the evolution from clinical to molecular approaches.

408 Nat Med. 2012 May;18(5):716-25.

409 2. Busse WW, Lemanske RF, Jr., Gern JE. Role of viral respiratory infections in asthma

410 and asthma exacerbations. Lancet. 2010 Sep 4;376(9743):826-34.

411 3. Holt PG, Sly PD. Viral infections and atopy in asthma pathogenesis: new rationales for

412 asthma prevention and treatment. Nat Med. 2012;18(5):726-35.

413 4. Bai TR, Vonk JM, Postma DS, Boezen HM. Severe exacerbations predict excess lung

414 function decline in asthma. Eur Respir J. 2007;30(3):452-6.

415 5. O'Byrne PM, Pedersen S, Lamm CJ, Tan WC, Busse WW. Severe exacerbations and

416 decline in lung function in asthma. Am J Respir Crit Care Med. 2009;179(1):19-24.

417 6. Bosco A, Ehteshami S, Stern DA, Martinez FD. Decreased activation of inflammatory

418 networks during acute asthma exacerbations is associated with chronic airflow obstruction.

419 Mucosal Immunol. 2010;3(4):399-409.

420 7. Busse WW, Morgan WJ, Gergen PJ, Mitchell HE, Gern JE, Liu AH, et al. Randomized

421 trial of omalizumab (anti-IgE) for asthma in inner-city children. N Engl J Med.

422 2011;364(11):1005-15.

423 8. Teach SJ, Gill MA, Togias A, Sorkness CA, Arbes SJ, Jr., Calatroni A, et al. Preseasonal

424 treatment with either omalizumab or an inhaled corticosteroid boost to prevent fall asthma

425 exacerbations. J Allergy Clin Immunol. 2015;136(6):1476-85.

426 9. Wenzel S, Wilbraham D, Fuller R, Getz EB, Longphre M. Effect of an interleukin-4

427 variant on late phase asthmatic response to allergen challenge in asthmatic patients: results

428 of two phase 2a studies. Lancet. 2007;370(9596):1422-31.

- 429 10. Straker LM, Hall GL, Mountain J, Howie EK, White E, McArdle N, et al. Rationale,  
430 design and methods for the 22 year follow-up of the Western Australian Pregnancy Cohort  
431 (Raine) Study. *BMC Public Health*. 2015;15:663.
- 432 11. Hollams EM, Devereill M, Serralha M, Suriyaarachchi D, Parsons F, Zhang G, et al.  
433 Elucidation of asthma phenotypes in atopic teenagers through parallel immunophenotypic  
434 and clinical profiling. *The Journal of allergy and clinical immunology*. 2009;124(3):463-70, 70  
435 e1-16.
- 436 12. Colloff MJ, Stewart GA, Thompson PJ. House dust acarofauna and Der p I equivalent  
437 in Australia: the relative importance of *Dermatophagoides pteronyssinus* and *Euroglyphus*  
438 *maynei*. *Clin Exp Allergy*. 1991;21(2):225-30.
- 439 13. Baines KJ, Simpson JL, Wood LG, Scott RJ, Gibson PG. Transcriptional phenotypes of  
440 asthma defined by gene expression profiling of induced sputum samples. *J Allergy Clin*  
441 *Immunol*. 2011;127(1):153-60, 60 e1-9.
- 442 14. Yan X, Chu JH, Gomez J, Koenigs M, Holm C, He X, et al. Noninvasive analysis of the  
443 sputum transcriptome discriminates clinical phenotypes of asthma. *Am J Respir Crit Care*  
444 *Med*. 2015;191(10):1116-25.
- 445 15. Wood LG, Powell H, Gibson PG. Mannitol challenge for assessment of airway  
446 responsiveness, airway inflammation and inflammatory phenotype in asthma. *Clin Exp*  
447 *Allergy*. 2010;40(2):232-41.
- 448 16. Pizzichini E, Pizzichini MM, Efthimiadis A, Hargreave FE, Dolovich J. Measurement of  
449 inflammatory indices in induced sputum: effects of selection of sputum to minimize salivary  
450 contamination. *Eur Respir J*. 1996;9(6):1174-80.
- 451 17. Liao Y, Smyth GK, Shi W. The Subread aligner: fast, accurate and scalable read  
452 mapping by seed-and-vote. *Nucleic Acids Res*. 2013;41(10):e108.

- 453 18. Anders S, McCarthy DJ, Chen Y, Okoniewski M, Smyth GK, Huber W, et al. Count-  
454 based differential expression analysis of RNA sequencing data using R and Bioconductor. *Nat*  
455 *Protoc.* 2013;8(9):1765-86.
- 456 19. Risso D, Ngai J, Speed TP, Dudoit S. Normalization of RNA-seq data using factor  
457 analysis of control genes or samples. *Nat Biotechnol.* 2014;32(9):896-902.
- 458 20. Bosco A, Ehteshami S, Panyala S, Martinez FD. Interferon regulatory factor 7 is a  
459 major hub connecting interferon-mediated responses in virus-induced asthma exacerbations  
460 in vivo. *The Journal of allergy and clinical immunology.* 2012;129(1):88-94.
- 461 21. Bosco A, McKenna KL, Firth MJ, Sly PD, Holt PG. A network modeling approach to  
462 analysis of the Th2 memory responses underlying human atopic disease. *Journal of*  
463 *immunology.* 2009;182(10):6011-21.
- 464 22. Chen EY, Tan CM, Kou Y, Duan Q, Wang Z, Meirelles GV, et al. Enrichr: interactive and  
465 collaborative HTML5 gene list enrichment analysis tool. *BMC Bioinformatics.* 2013;14:128.
- 466 23. Ma'ayan A. Insights into the organization of biochemical regulatory networks using  
467 graph theory analyses. *J Biol Chem.* 2009;284(9):5451-5.
- 468 24. Lu X, Jain VV, Finn PW, Perkins DL. Hubs in biological interaction networks exhibit low  
469 changes in expression in experimental asthma. *Molecular systems biology.* 2007;3:98.
- 470 25. Bonnelykke K, Sleiman P, Nielsen K, Kreiner-Moller E, Mercader JM, Belgrave D, et al.  
471 A genome-wide association study identifies CDHR3 as a susceptibility locus for early  
472 childhood asthma with severe exacerbations. *Nat Genet.* 2014;46(1):51-5.
- 473 26. Wills-Karp M. Interleukin-13 in asthma pathogenesis. *Immunol Rev.* 2004;202:175-  
474 90.

- 475 27. Vallath S, Hynds RE, Succony L, Janes SM, Giangreco A. Targeting EGFR signalling in  
476 chronic lung disease: therapeutic challenges and opportunities. *Eur Respir J.* 2014;44(2):513-  
477 22.
- 478 28. Puddicombe SM, Polosa R, Richter A, Krishna MT, Howarth PH, Holgate ST, et al.  
479 Involvement of the epidermal growth factor receptor in epithelial repair in asthma. *FASEB J.*  
480 2000;14(10):1362-74.
- 481 29. Le Cras TD, Acciani TH, Mushaben EM, Kramer EL, Pastura PA, Hardie WD, et al.  
482 Epithelial EGF receptor signaling mediates airway hyperreactivity and remodeling in a mouse  
483 model of chronic asthma. *Am J Physiol Lung Cell Mol Physiol.* 2011;300(3):L414-21.
- 484 30. Polosa R, Puddicombe SM, Krishna MT, Tuck AB, Howarth PH, Holgate ST, et al.  
485 Expression of c-erbB receptors and ligands in the bronchial epithelium of asthmatic subjects.  
486 *J Allergy Clin Immunol.* 2002;109(1):75-81.
- 487 31. Song GG, Lee YH. Pathway analysis of genome-wide association study on asthma.  
488 *Hum Immunol.* 2013;74(2):256-60.
- 489 32. Vermeer PD, Panko L, Karp P, Lee JH, Zabner J. Differentiation of human airway  
490 epithelia is dependent on erbB2. *Am J Physiol Lung Cell Mol Physiol.* 2006 Aug;291(2):L175-  
491 80.
- 492 33. Kettle R, Simmons J, Schindler F, Jones P, Dicker T, Dubois G, et al. Regulation of  
493 neuregulin 1beta1-induced MUC5AC and MUC5B expression in human airway epithelium.  
494 *Am J Respir Cell Mol Biol.* 2010;42(4):472-81.
- 495 34. Mackay A, Jones C, Dexter T, Silva RL, Bulmer K, Jones A, et al. cDNA microarray  
496 analysis of genes associated with ERBB2 (HER2/neu) overexpression in human mammary  
497 luminal epithelial cells. *Oncogene.* 2003;22(17):2680-8.

- 498 35. Angelini PD, Zacarias Fluck MF, Pedersen K, Parra-Palau JL, Guiu M, Bernado Morales  
499 C, et al. Constitutive HER2 signaling promotes breast cancer metastasis through cellular  
500 senescence. *Cancer Res.* 2013;73(1):450-8.
- 501 36. Erle DJ, Sheppard D. The cell biology of asthma. *J Cell Biol.* 2014;205(5):621-31.
- 502 37. Schroeder BW, Verhaeghe C, Park SW, Nguyenvu LT, Huang X, Zhen G, et al. AGR2 is  
503 induced in asthma and promotes allergen-induced mucin overproduction. *Am J Respir Cell  
504 Mol Biol.* 2012;47(2):178-85.
- 505 38. Nawijn MC, Hackett TL, Postma DS, van Oosterhout AJ, Heijink IH. E-cadherin:  
506 gatekeeper of airway mucosa and allergic sensitization. *Trends Immunol.* 2011;32(6):248-55.
- 507 39. Post S, Nawijn MC, Hackett TL, Baranowska M, Gras R, van Oosterhout AJ, et al. The  
508 composition of house dust mite is critical for mucosal barrier dysfunction and allergic  
509 sensitisation. *Thorax.* 2012;67(6):488-95.
- 510 40. Ierodiakonou D, Postma DS, Koppelman GH, Boezen HM, Gerritsen J, Ten Hacken N,  
511 et al. E-cadherin gene polymorphisms in asthma patients using inhaled corticosteroids. *Eur  
512 Respir J.* 2011;38(5):1044-52.
- 513 41. Kim EY, Battaile JT, Patel AC, You Y, Agapov E, Grayson MH, et al. Persistent  
514 activation of an innate immune response translates respiratory viral infection into chronic  
515 lung disease. *Nat Med.* 2008;14(6):633-40.
- 516 42. Lambrecht BN, Hammad H. The immunology of asthma. *Nat Immunol.* 2015;16(1):45-  
517 56.
- 518 43. Licona-Limon P, Kim LK, Palm NW, Flavell RA. TH2, allergy and group 2 innate  
519 lymphoid cells. *Nat Immunol.* 2013;14(6):536-42.



- 520 44. Schmitz J, Owyang A, Oldham E, Song Y, Murphy E, McClanahan TK, et al. IL-33, an  
521 interleukin-1-like cytokine that signals via the IL-1 receptor-related protein ST2 and induces  
522 T helper type 2-associated cytokines. *Immunity*. 2005;23(5):479-90.
- 523 45. Llop-Guevara A, Chu DK, Walker TD, Goncharova S, Fattouh R, Silver JS, et al. A GM-  
524 CSF/IL-33 pathway facilitates allergic airway responses to sub-threshold house dust mite  
525 exposure. *PLoS One*. 2014;9(2):e88714.
- 526 46. Hajek AR, Lindley AR, Favoreto S, Jr., Carter R, Schleimer RP, Kuperman DA. 12/15-  
527 Lipoxygenase deficiency protects mice from allergic airways inflammation and increases  
528 secretory IgA levels. *J Allergy Clin Immunol*. 2008;122(3):633-9 e3.
- 529 47. Sevin CM, Newcomb DC, Toki S, Han W, Sherrill TP, Boswell MG, et al. Deficiency of  
530 gp91phox inhibits allergic airway inflammation. *Am J Respir Cell Mol Biol*. 2013;49(3):396-  
531 402.
- 532 48. Sehra S, Yao W, Nguyen ET, Ahyi AN, Tuana FM, Ahlfeld SK, et al. Periostin regulates  
533 goblet cell metaplasia in a model of allergic airway inflammation. *J Immunol*.  
534 2011;186(8):4959-66.
- 535 49. Sivaprasad U, Askew DJ, Ericksen MB, Gibson AM, Stier MT, Brandt EB, et al. A  
536 nonredundant role for mouse Serpinb3a in the induction of mucus production in asthma. *J*  
537 *Allergy Clin Immunol*. 2011;127(1):254-61, 61 e1-6.
- 538 50. Rajavelu P, Chen G, Xu Y, Kitzmiller JA, Korfhagen TR, Whitsett JA. Airway epithelial  
539 SPDEF integrates goblet cell differentiation and pulmonary Th2 inflammation. *J Clin Invest*.  
540 2015;125(5):2021-31.
- 541 51. Zhen G, Park SW, Nguyenvu LT, Rodriguez MW, Barbeau R, Paquet AC, et al. IL-13  
542 and epidermal growth factor receptor have critical but distinct roles in epithelial cell mucin  
543 production. *Am J Respir Cell Mol Biol*. 2007;36(2):244-53.

- 544 52. Tyner JW, Kim EY, Ide K, Pelletier MR, Roswit WT, Morton JD, et al. Blocking airway  
545 mucous cell metaplasia by inhibiting EGFR antiapoptosis and IL-13 transdifferentiation  
546 signals. *J Clin Invest.* 2006;116(2):309-21.
- 547 53. Thomas B, Rutman A, Hirst RA, Haldar P, Wardlaw AJ, Bankart J, et al. Ciliary  
548 dysfunction and ultrastructural abnormalities are features of severe asthma. *J Allergy Clin*  
549 *Immunol.* 2010;126(4):722-9 e2.
- 550 54. Ross AJ, Dailey LA, Brighton LE, Devlin RB. Transcriptional profiling of mucociliary  
551 differentiation in human airway epithelial cells. *Am J Respir Cell Mol Biol.* 2007;37(2):169-85.  
552  
553

554 **Figures**

555

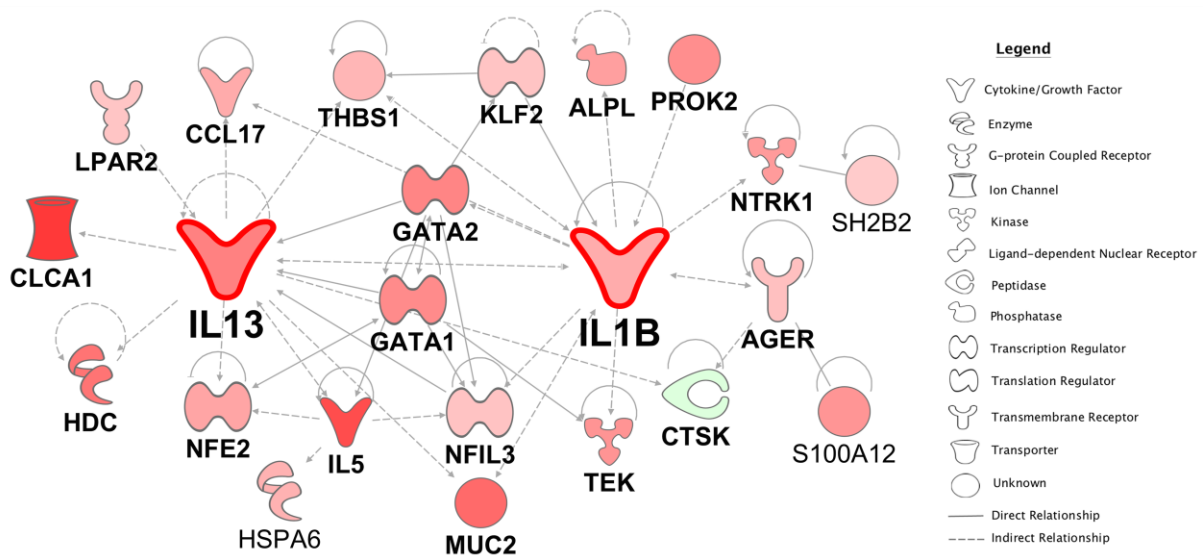

556

557 **Figure 1:** Gene expression patterns in sputum were compared between HDM<sup>S</sup> nonwheezers  
558 and nonatopic controls. The network was reconstructed employing prior knowledge from  
559 the literature. Genes highlighted in red denote upregulation, whilst green indicates  
560 downregulation in HDM<sup>S</sup> nonwheezers.

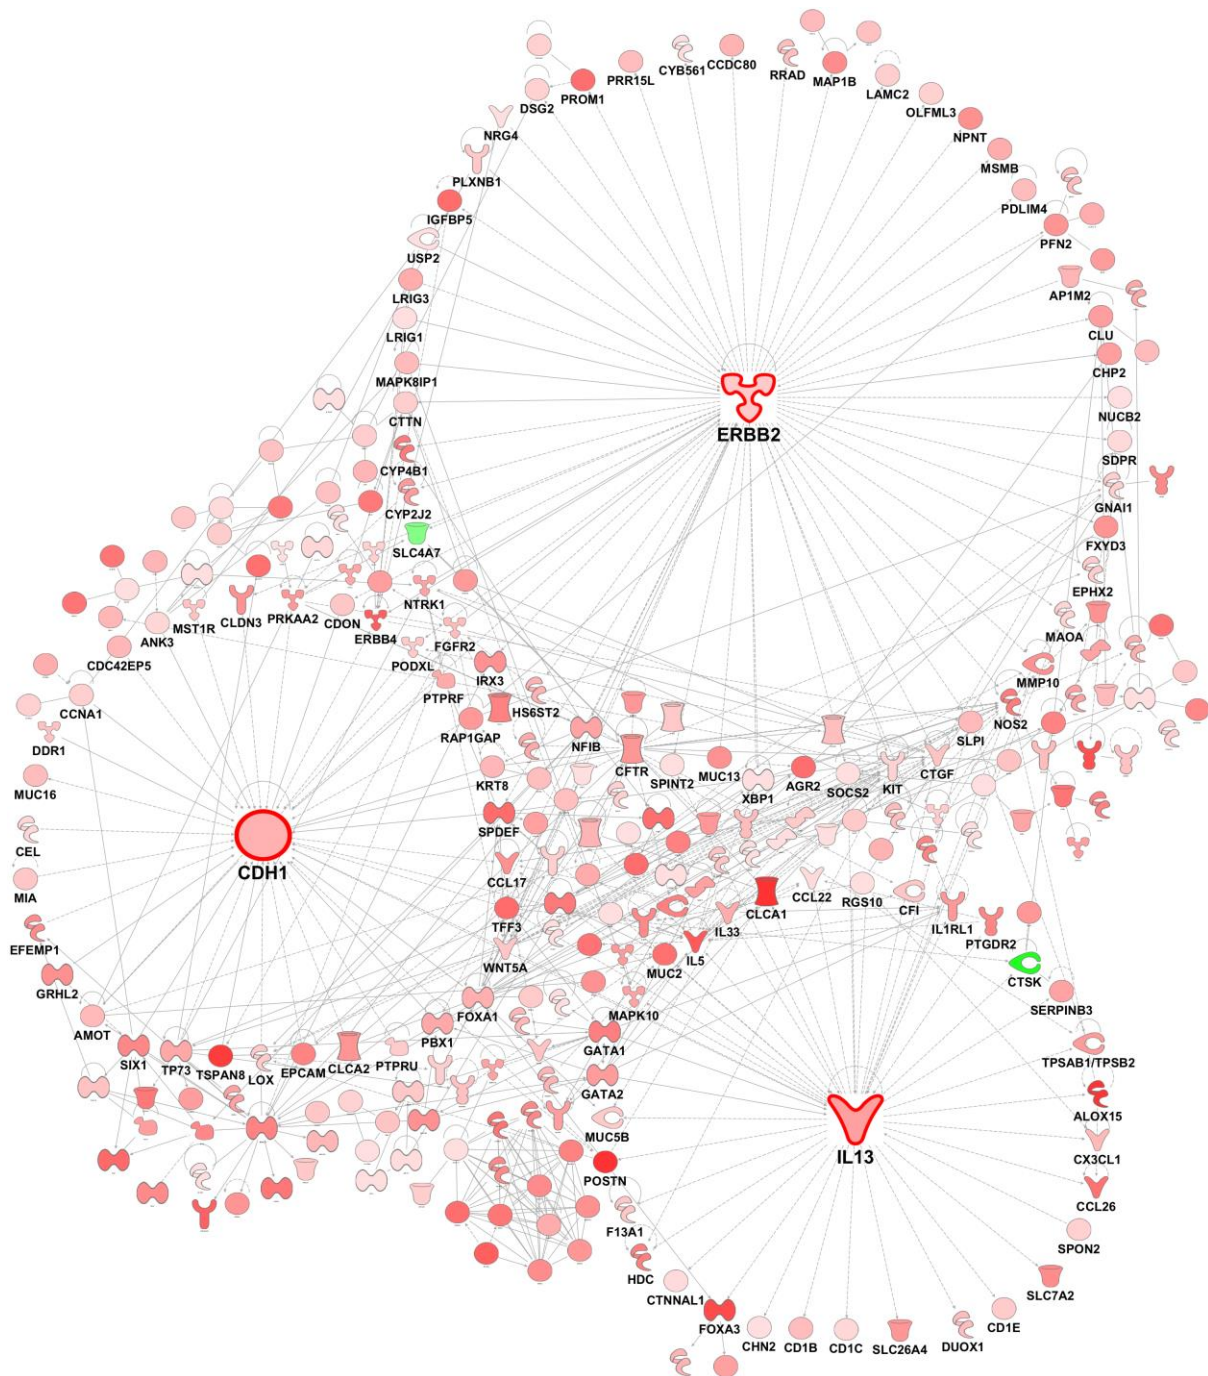

561

562 **Figure 2:** Gene expression patterns in sputum were compared between HDM<sup>S</sup> wheezers and  
563 nonatopic controls. The gene network was reconstructed using prior knowledge. Genes  
564 highlighted in red denote upregulation, whilst molecules in green indicate downregulation in  
565 HDM<sup>S</sup> wheezers.

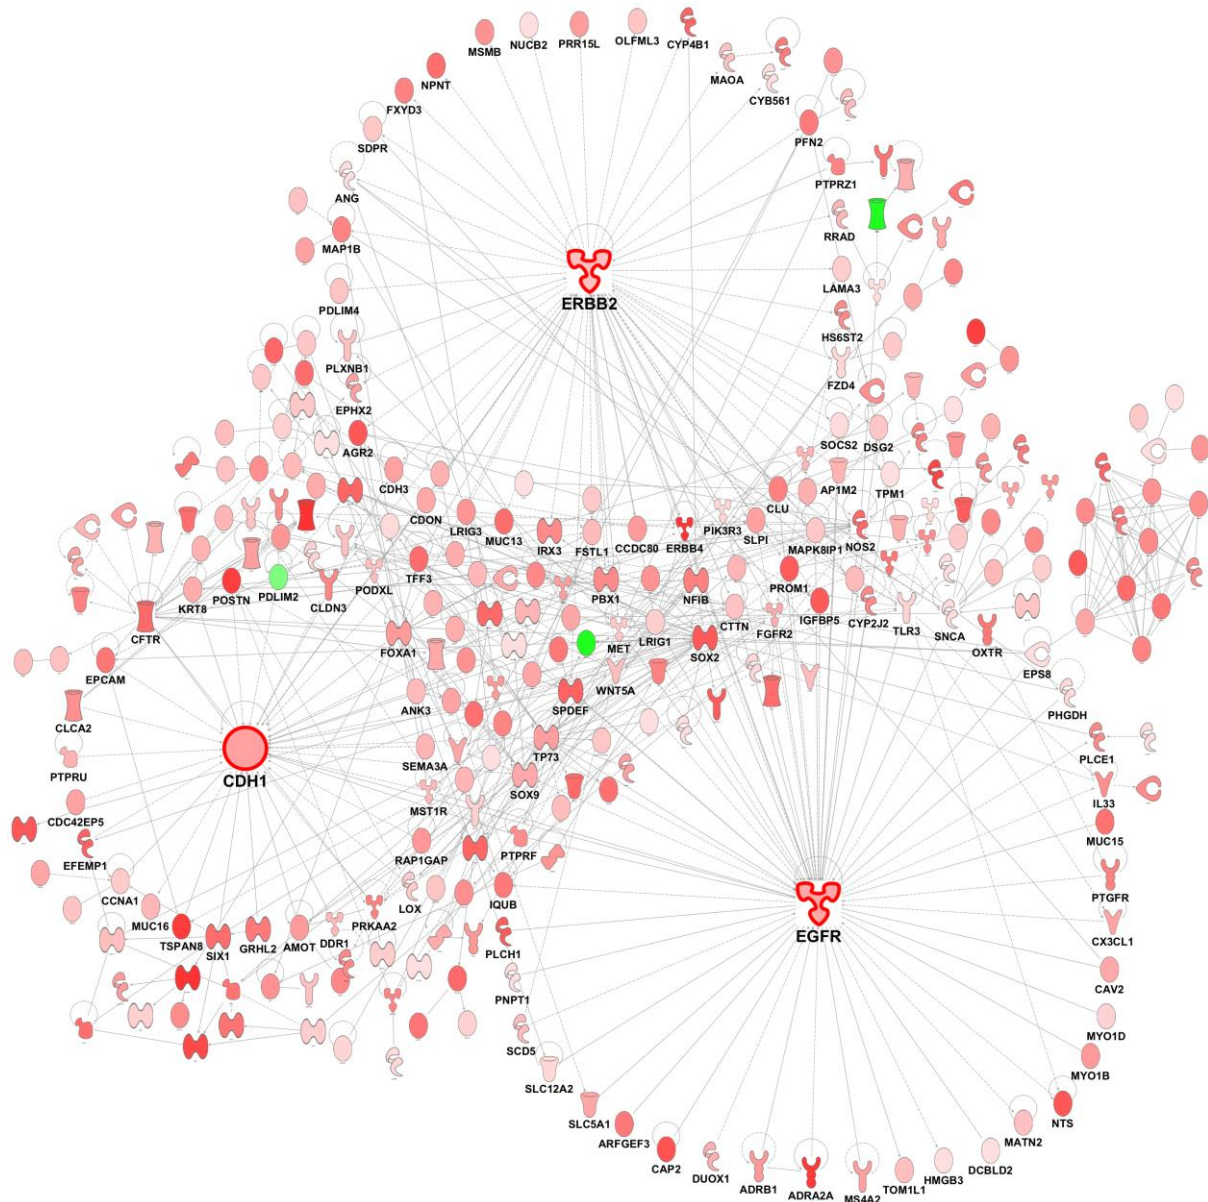

566

567 **Figure 3:** Gene expression patterns in sputum were compared between HDM<sup>S</sup> wheezers  
568 versus HDM<sup>S</sup> nonwheezers. The network was reconstructed employing prior knowledge  
569 from the literature. Genes highlighted in red denote upregulation, whilst molecules in green  
570 indicate downregulation in HDM<sup>S</sup> wheezers.

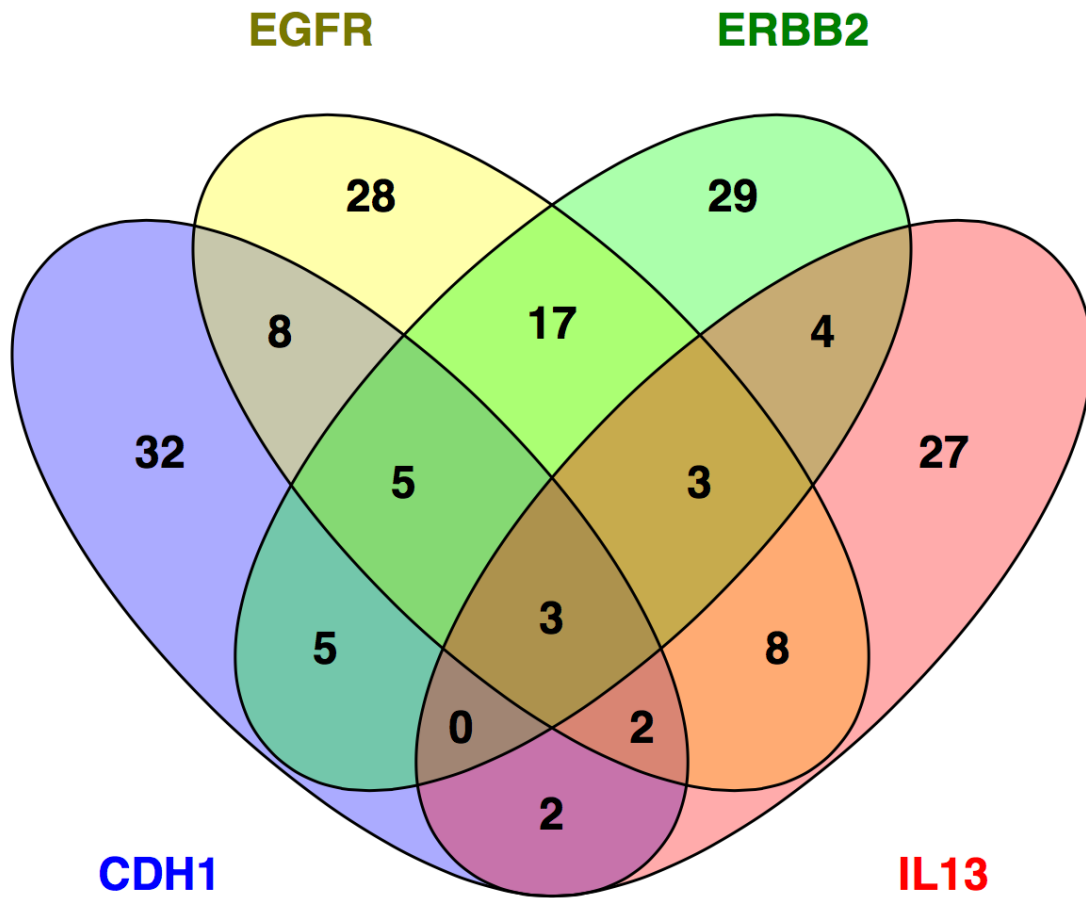

571

572 **Figure 4:** The Venn diagram illustrates the overlap between the genes that are networked

573 with each hub.

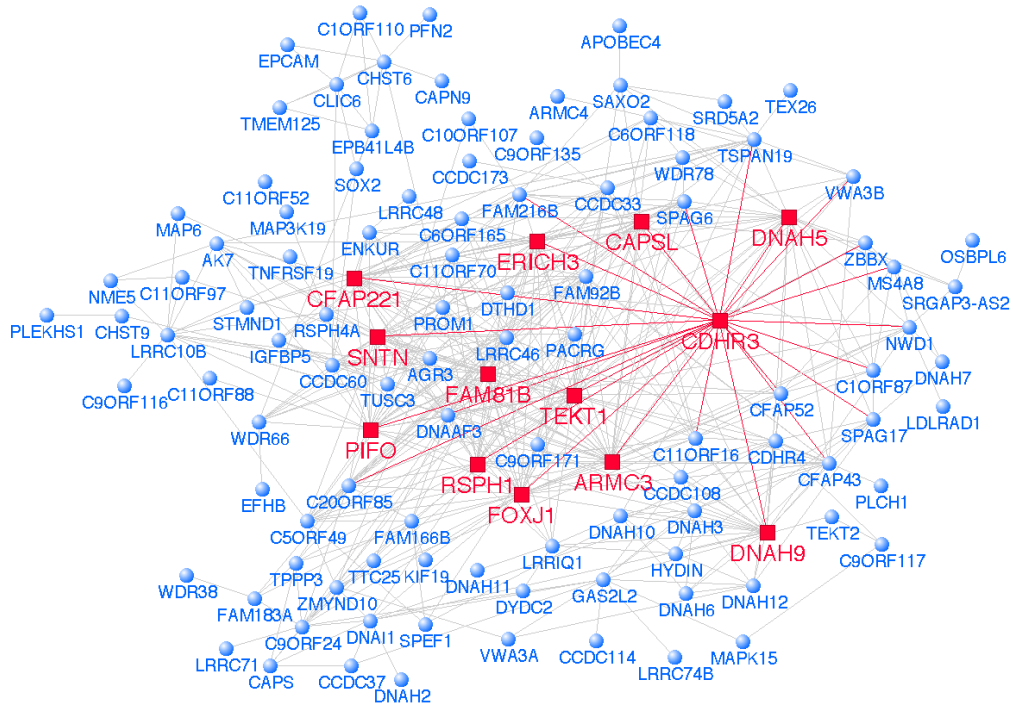

574

575 **Figure 5:** Reconstruction of the mucociliary clearance module identifies CDHR3 as a hub.

576 This module was reconstructed with weighted correlation network analysis (WGCNA). The

577 dominant hubs are highlighted in red.

578

579

580

581

582

583

584

585

586

587

588

589

590

**A**

591

Nonatopic  
control

592

593

594

Atopic  
asthmatic

595

596

**B**

597

598

599

600

601

602

603

604

605

606

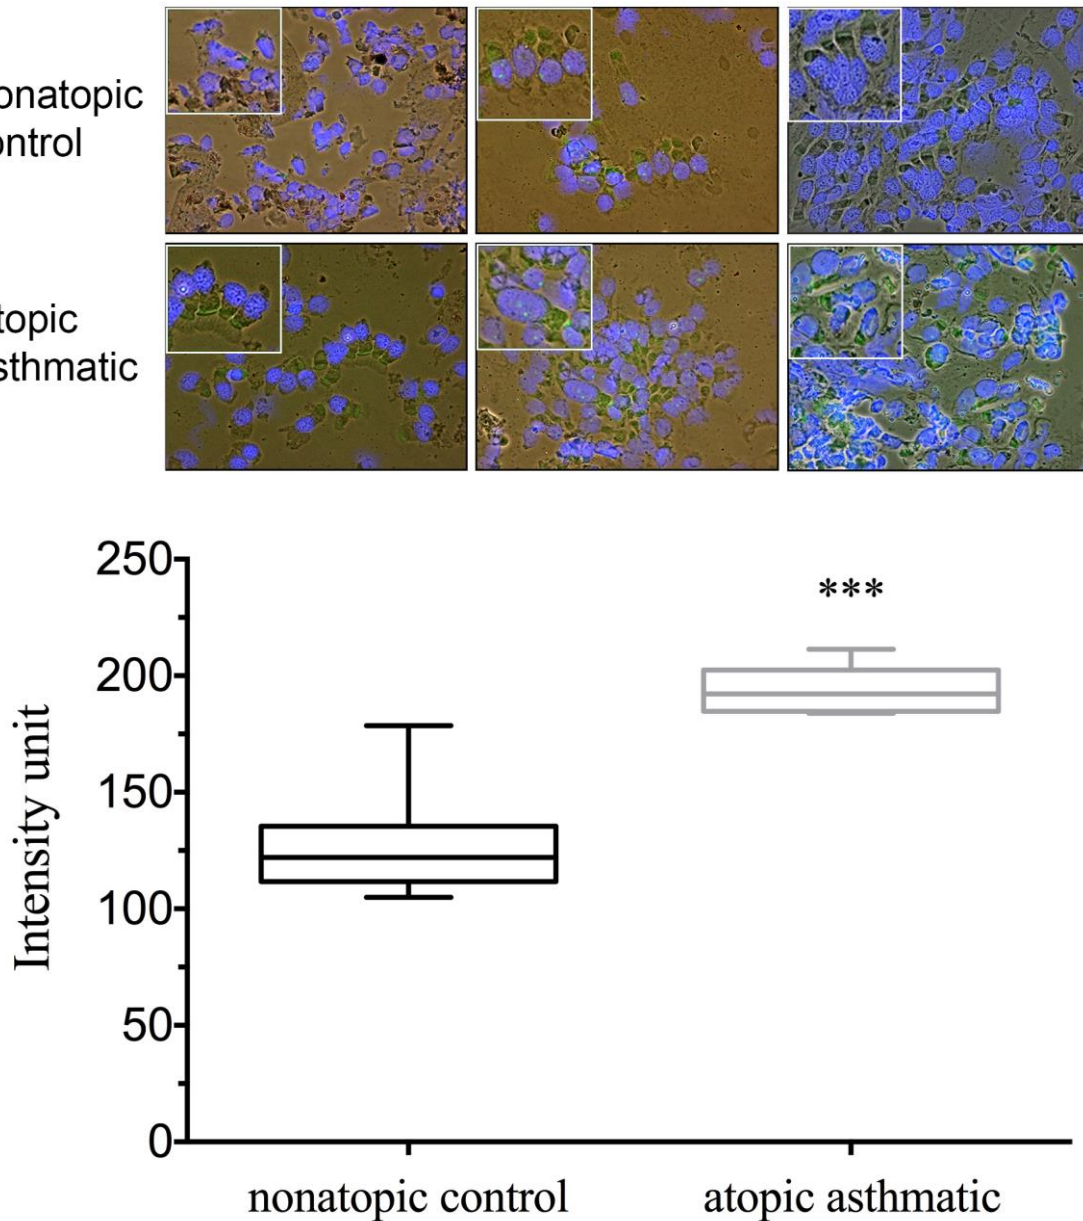

607 **Figure 6:** Expression of CDHR3 in bronchial epithelial cells from HDM sensitized atopics with

608 asthma and nonatopic controls. **A)** Bronchial epithelial cells were immunofluorescently

609 stained for CDHR3 expression (green) and nuclei with DAPI (blue). Staining images were then

610 overlaid over bright field images taken of the same field of view. Note: mag 200x; inset 400x.

611 **B)** Quantification of the images demonstrated that the expression was more intense in the

612 atopics with asthma. \*\*\* P-value < 0.001
